# Supplementary material for: PNPLA3-I148M genetic variant rewires lipid metabolism to drive programmed cell death in human hepatocytes
Source: JCI journal article supplement (doi:10.1172/jci.insight.193805), 2025-10-21

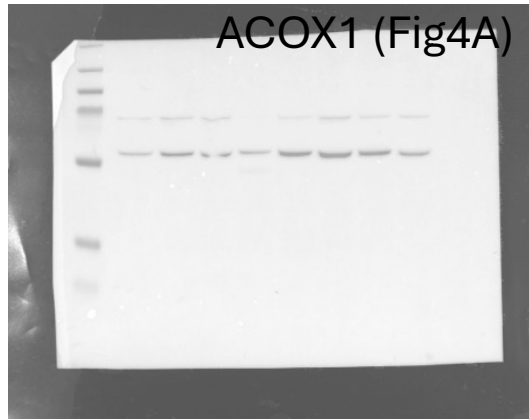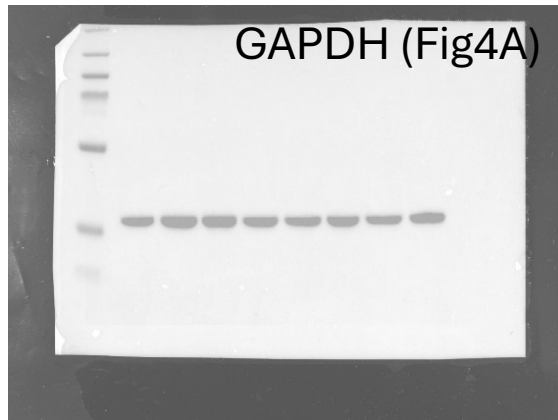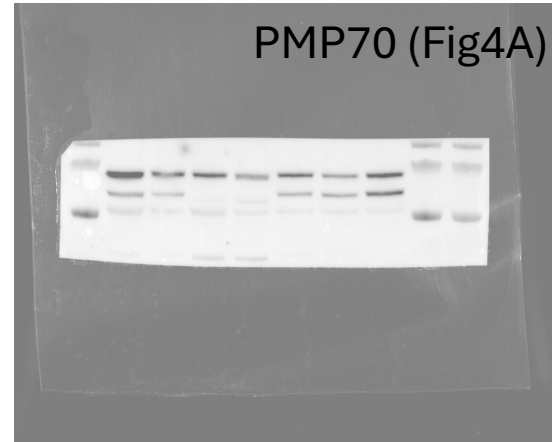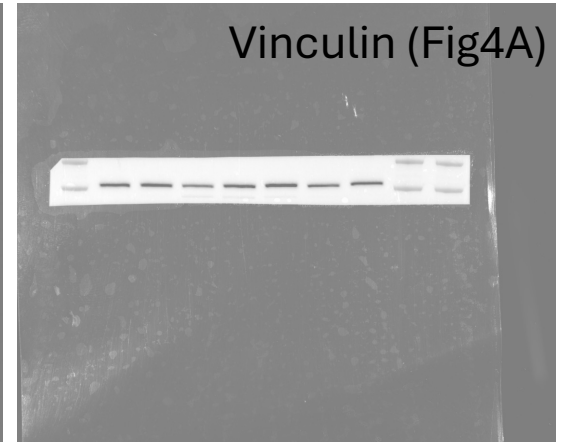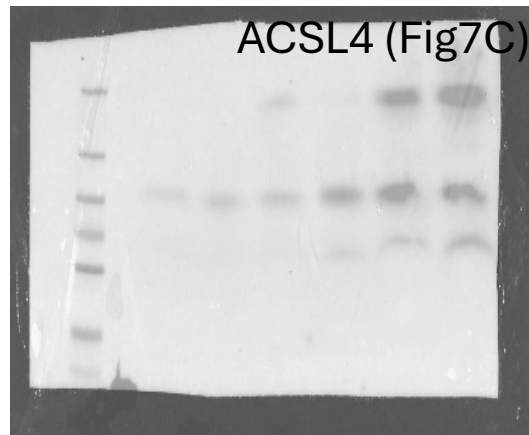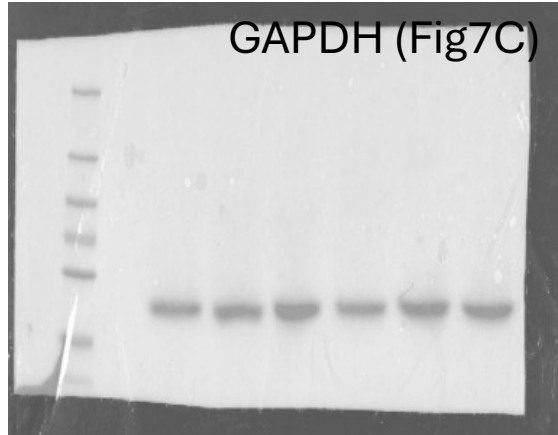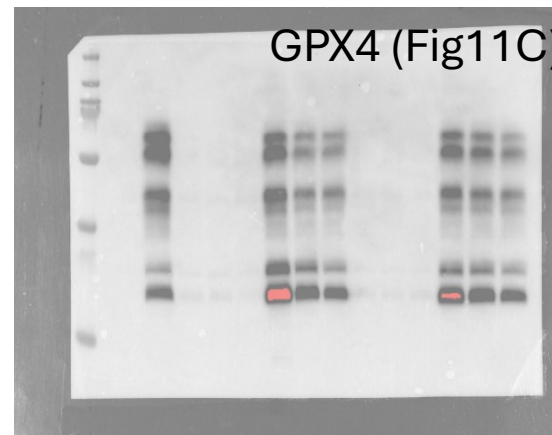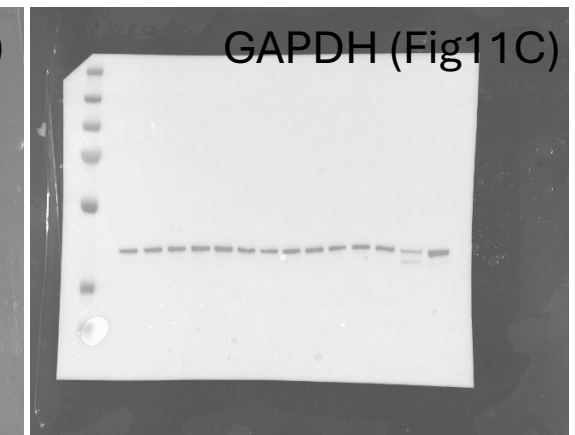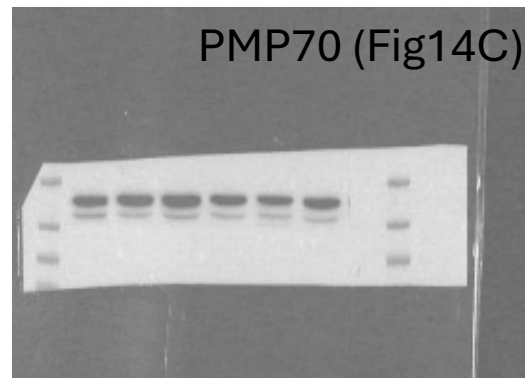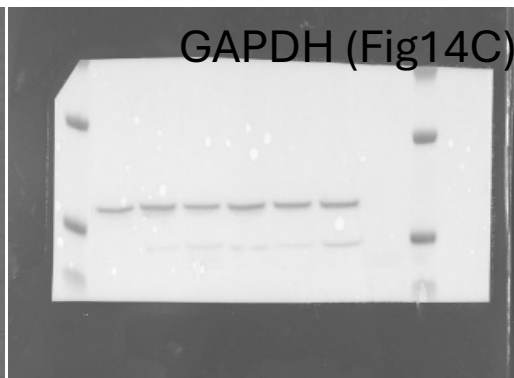

Supplement: sd2 [file 2]
